# Supplementary material for: Cymbopogon winterianus (Java Citronella Plant): A Multi-Faceted Approach for Food Preservation, Insecticidal Effects, and Bread Application
Source: MDPI journal article supplement (doi:10.3390/foods13050803), 2024-03-05
Supplement: s1 [file s1]

# ***Cymbopogon winterianus* (Java Citronella Plant): A Multi-Faceted Approach for Food Preservation, Insecticidal Effects, and Bread Application**

**Marwa Rammal <sup>1</sup>, Adnan Badran <sup>2</sup>, Chaden Haidar <sup>1</sup>, Abbas Sabbah <sup>1</sup>, Mikhael Bechelany <sup>3,4,\*</sup>, Maya Awada <sup>1</sup>, Khodor Haidar Hassan <sup>1</sup>, Mohammad El-Dakdouki <sup>5,\*</sup> and Mohamad T. Raad <sup>6</sup>**

<sup>1</sup> Department of Food and Technology Studies, Faculty of Agronomy, Lebanese University, Beirut P.O. Box 146404, Lebanon; marwa.rammal.1@ul.edu.lb (M.R.); chaden.haidar@iul.edu.lb (C.H.); abbas.sabbah@gmail.com (A.S.); maya.awada19@gmail.com (M.A.); khodorhh@gmail.com (K.H.H.)

<sup>2</sup> Department of Nutrition, University of Petra Amman Jordan, Amman P.O. Box 961343, Jordan; abadran12@gmail.com

<sup>3</sup> Institut Européen des Membranes (IEM), UMR-5635, University of Montpellier, École Nationale Supérieure de Chimie de Montpellier (ENSCM), Centre National de la Recherche Scientifique (CNRS), Place Eugene Bataillon, 34095 Montpellier, France

<sup>4</sup> Functional Materials Group, Gulf University for Science and Technology (GUST), Mubarak Al-Abdullah 32093, Kuwait

<sup>5</sup> Department of Chemistry, Faculty of Science, Beirut Arab University, P.O. Box 11-5020, Riad El Solh, Beirut 11072809, Lebanon

<sup>6</sup> Department of Chemistry, Lebanese International University-Beirut (LIU), Salim Street, Mazraa, Beirut 146404, Lebanon; mohamad.raad01@liu.edu.lb

\* Correspondence: mikhael.bechelany@umontpellier.fr (M.B.); m.eldakdouki@bau.edu.lb (M.E.-D.)

## **Post Hoc analysis: compare means, one way ANOVA**

**Table S1. Statistical analysis of the bread fortified with Java Citronella powder moisture content at day 1 by using oven dried method.**

| Effect    | Repeated Measures Analysis of Variance (Spreadsheet4) Sigma-restricted parameterization Effective hypothesis decomposition |                  |          |          |          |
|-----------|----------------------------------------------------------------------------------------------------------------------------|------------------|----------|----------|----------|
|           | SS                                                                                                                         | Degr. of Freedom | MS       | F        | p        |
| Intercept | 26675.61                                                                                                                   | 1                | 26675.61 | 66240.37 | 0.000015 |
| Error     | 0.81                                                                                                                       | 2                | 0.40     |          |          |
| Sample    | 1.10                                                                                                                       | 6                | 0.18     | 1.70     | 0.203679 |
| Error     | 1.29                                                                                                                       | 12               | 0.11     |          |          |

**Table S2. Statistical analysis of the bread fortified with Java Citronella powder moisture content at day 4 by using oven dried method.**

|           | SS       | Degr. of Freedom | MS       | F        | p        |
|-----------|----------|------------------|----------|----------|----------|
| Intercept | 13519.17 | 1                | 13519.17 | 11787.07 | 0.000085 |
| Error     | 2.29     | 2                | 1.15     |          |          |
| Sample    | 148.69   | 6                | 24.78    | 117.76   | 0.000000 |
| Error     | 2.53     | 12               | 0.21     |          |          |

**Table S3. Statistical analysis of the bread fortified with Java Citronella powder moisture content at day 8 by using oven dried method.**

| Effect    | Repeated Measures Analysis of Variance (Spreadsheet4) Sigma-restricted parameterization Effective hypothesis decomposition |                  |          |          |          |
|-----------|----------------------------------------------------------------------------------------------------------------------------|------------------|----------|----------|----------|
|           | SS                                                                                                                         | Degr. of Freedom | MS       | F        | p        |
| Intercept | 7059.177                                                                                                                   | 1                | 7059.177 | 5378.996 | 0.000186 |
| Error     | 2.625                                                                                                                      | 2                | 1.312    |          |          |
| Sample    | 39.771                                                                                                                     | 6                | 6.629    | 25.476   | 0.000004 |
| Error     | 3.122                                                                                                                      | 12               | 0.260    |          |          |
